# Supplementary material
Source: publisher site journal article supplement (https://www.dovepress.com/article/452628)
Supplement: Supplementary file 1 [file get_supplementary_file.php]

## Supplementary Information

**Table S1** Patient demographics and clinicopathological characteristics

| Variable                   | Total<br>(n=340) | HBOL cohort<br>(n=95) | HMOL cohort<br>(n=245) |
|----------------------------|------------------|-----------------------|------------------------|
| Gender n (%)               |                  |                       |                        |
| Female                     | 92               | 56 (58.95%)           | 36 (14.69%)            |
| Male                       | 248              | 39 (41.05%)           | 209 (85.31%)           |
| Age (years), mean $\pm$ SD | 340              | 47.21 $\pm$ 14.29     | 55.07 $\pm$ 10.85      |
| Tumor size (cm), n (%)     |                  |                       |                        |
| $\leq$ 5                   | 169              | 61 (64.21%)           | 108 (44.08)            |
| $>$ 5                      | 171              | 34 (35.79%)           | 137 (55.92)            |
| Tumor number n (%)         |                  |                       |                        |
| Single                     | 251              | 50 (52.63%)           | 201 (82.04%)           |
| Multiple                   | 89               | 45 (47.37%)           | 44 (17.96%)            |
| Hepatitis B Virus n (%)    |                  |                       |                        |
| Negative                   | 199              | 86 (90.53%)           | 113 (46.12%)           |
| Positive                   | 141              | 9 (9.47%)             | 132 (53.88%)           |
| Hepatitis C Virus n (%)    |                  |                       |                        |
| Negative                   | 338              | 95 (100.00%)          | 243 (99.18%)           |
| Positive                   | 2                | 0 (0.00%)             | 2 (0.82%)              |
| BCLC staging n (%)         |                  |                       |                        |
| A                          | 159              | -                     | 159 (64.90%)           |
| B                          | 34               | -                     | 34 (13.88%)            |
| C                          | 51               | -                     | 51 (20.82%)            |
| D                          | 1                | -                     | 1 (0.41%)              |
| Tumor classification n (%) |                  |                       |                        |
| Hepatic hemangiomas        | 35               | 35 (36.84%)           | -                      |
| FNH                        | 14               | 14 (14.74%)           | -                      |
| HCA                        | 5                | 5 (5.26%)             | -                      |
| Hepatic cyst               | 27               | 27 (28.42%)           | -                      |
| Multiple HBOL              | 14               | 14 (14.74)            | -                      |
| HCC                        | 210              | -                     | 210 (85.71%)           |
| ICC                        | 29               | -                     | 29 (11.84%)            |
| cHCC-CCA                   | 2                | -                     | 2 (0.82%)              |
| Unclear HMOL               | 4                | -                     | 4 (1.63%)              |

**Abbreviations:** HBOL, hepatic benign occupying lesions; HMOL, hepatic malignant occupying lesions; BCLC, Barcelona Clinic Liver Cancer; FNH, focal nodular hyperplasia; HCA, hepatocellular adenoma; HCC, hepatocellular cholangiocarcinoma; ICC, intrahepatic cholangiocarcinoma; cHCC-CCA, combined hepatocellular-cholangiocarcinoma.

**Table S2** Comparison of variables between training and validation sets

| Variable                        | Training set (n = 237)   | Validation set (n = 103) | P     |
|---------------------------------|--------------------------|--------------------------|-------|
| Group n (%)                     |                          |                          | 0.748 |
| HBOL                            | 65 (27.43%)              | 30 (29.13%)              |       |
| HMOL                            | 172 (72.57%)             | 73 (70.87%)              |       |
| Gender n (%)                    |                          |                          | 0.973 |
| Female                          | 64 (27.00%)              | 28 (27.18%)              |       |
| Male                            | 173 (73.00%)             | 75 (72.82%)              |       |
| Age (years)                     | 54.00 (46.00 - 62.00)    | 53.00 (45.50 - 62.50)    | 0.446 |
| PLT ( $\times 10^9/L$ )         | 218.00 (173.00 - 267.00) | 227.00 (172.00 - 282.50) | 0.582 |
| PT (s)                          | 12.20 (11.60 - 13.20)    | 12.40 (11.55 - 13.35)    | 0.692 |
| TT (s)                          | 17.90 (17.10 - 19.10)    | 18.20 (17.10 - 19.10)    | 0.627 |
| FIB (g/L)                       | 2.97 (2.44 - 3.64)       | 2.90 (2.31 - 3.98)       | 0.916 |
| D-Dimer (mg/L)                  | 0.38 (0.14 - 2.11)       | 0.35 (0.15 - 1.08)       | 0.582 |
| Log <sub>10</sub> (DCP) (ng/mL) | 1.33 (0.70 - 2.24)       | 1.37 (0.68 - 2.13)       | 0.99  |
| TBIL ( $\mu\text{mol/L}$ )      | 13.30 (10.10 - 18.30)    | 12.10 (10.15 - 16.80)    | 0.281 |
| DBIL ( $\mu\text{mol/L}$ )      | 4.80 (3.30 - 6.90)       | 4.40 (3.45 - 6.10)       | 0.606 |
| SF ( $\mu\text{g/L}$ )          | 331.00 (171.00 - 572.00) | 322.00 (168.00 - 535.00) | 0.686 |
| ALT (U/L)                       | 29.00 (18.00 - 44.00)    | 28.00 (16.00 - 43.00)    | 0.42  |
| AST (U/L)                       | 34.00 (26.00 - 46.00)    | 31.00 (25.00 - 52.00)    | 0.755 |
| ALP (U/L)                       | 82.00 (65.00 - 121.00)   | 85.00 (64.00 - 123.00)   | 0.612 |
| LDH (U/L)                       | 176.00 (155.00 - 208.00) | 181.00 (161.50 - 228.00) | 0.123 |
| $\gamma$ -GGT (U/L)             | 54.00 (30.00 - 119.00)   | 51.00 (28.00 - 124.50)   | 0.893 |
| AFU (U/L)                       | 23.00 (17.00 - 28.00)    | 22.00 (17.00 - 30.50)    | 0.81  |
| 5'-NT (U/L)                     | 8.00 (6.10 - 12.60)      | 8.50 (6.25 - 12.30)      | 0.512 |
| TBA ( $\mu\text{mol/L}$ )       | 7.40 (4.20 - 14.40)      | 7.30 (3.80 - 16.95)      | 0.703 |
| TK1 (pmol/L)                    | 0.91 (0.34 - 1.61)       | 0.93 (0.39 - 1.62)       | 0.618 |
| HSP90 $\alpha$ (ng/mL)          | 46.40 (33.80 - 72.20)    | 47.90 (34.88 - 74.65)    | 0.575 |
| C4 (g/L)                        | 0.21 (0.17 - 0.29)       | 0.21 (0.15 - 0.33)       | 0.924 |
| CEA (ng/mL)                     | 2.24 (1.49 - 3.62)       | 2.21 (1.30 - 3.41)       | 0.471 |
| CA125 (U/mL)                    | 11.60 (8.10 - 20.20)     | 12.50 (8.70 - 20.30)     | 0.257 |
| CA153 (U/mL)                    | 11.70 (7.80 - 17.40)     | 11.50 (6.85 - 15.50)     | 0.199 |
| CA199 (U/mL)                    | 8.10 (3.80 - 19.30)      | 9.40 (3.60 - 21.20)      | 0.664 |
| Log <sub>10</sub> (AFP) (ng/mL) | 0.56 (0.36 - 0.76)       | 0.54 (0.41 - 0.87)       | 0.309 |
| AFP-L3 (ng/mL)                  | 0.17 (0.10 - 0.28)       | 0.17 (0.11 - 0.39)       | 0.407 |
| HBsAg (IU/mL)                   | 36.95 (0.00 - 564.35)    | 0.05 (0.00 - 534.39)     | 0.163 |
| HBeAg (PEIU/mL)                 | 0.32 (0.05 - 0.40)       | 0.32 (0.05 - 0.41)       | 0.629 |

**Abbreviations:** HBOL, hepatic benign occupying lesions; HMOL, hepatic malignance occupying lesions; PLT, blood platelet; PT prothrombin time; APTT, activated partial thromboplastin time; TT, thrombin time; FIB, fibrinogen; DCP, des-gamma-carboxy prothrombin ; TBIL, total bilirubin; DBIL, direct bilirubin; SF, serum ferritin; ALT, alanine aminotransferase; AST, aspartate transaminase; ALP, alkaline phosphatase; LDH, lactate dehydrogenase;  $\gamma$ -GGT, gamma-glutamyltransferase; AFU, alpha-L-fucosidase; 5'-NT, 5'-nucleotidase; TBA, total bile acid; TK1, thymidine kinase 1; HSP90 $\alpha$ , heat-shock protein 90

alpha; C4, complement protein 4; CEA, carcinoembryonic antigen; CA125, carbohydrate antigen 125; CA153, carbohydrate antigen 153; CA199, carbohydrate antigen 199; AFP, alpha-fetoprotein; lens culinaris agglutinin-reactive fraction of AFP; HBsAg, hepatitis B surface antigen; HBeAg, hepatitis B e antigen.

**Table S3** LASSO results of training set

| <b>Variable</b>         | <b>Lambda.1SE</b> |
|-------------------------|-------------------|
| (Intercept)             | -2.2413915        |
| Gender                  | 0.7893091         |
| Age                     | 0.00529061        |
| PLT                     | 0                 |
| PT                      | 0                 |
| TT                      | 0                 |
| FIB                     | 0                 |
| D-Dimer                 | 0                 |
| log <sub>10</sub> (DCP) | 0.46909374        |
| TBIL                    | 0                 |
| DBIL                    | 0                 |
| SF                      | 0.00110221        |
| ALT                     | 0                 |
| AST                     | 0                 |
| ALP                     | 0                 |
| LDH                     | 0                 |
| γ-GGT                   | 0                 |
| AFU                     | 0                 |
| 5-NT                    | 0                 |
| TBA                     | 0                 |
| TK1                     | 0                 |
| HSP90α                  | 0                 |
| C4                      | 0                 |
| CEA                     | 0                 |
| CA125                   | 0                 |
| CA153                   | 0                 |
| CA199                   | 0                 |
| log <sub>10</sub> (AFP) | 0.69516552        |
| AFP-L3                  | 0                 |
| HBsAg                   | 0.00065917        |
| HBeAg                   | 0                 |

**Abbreviations:** LASSO, least absolute shrinkage and selection operator; SE, standard error; PLT, blood platelet; PT prothrombin time; APTT, activated partial thromboplastin time; TT, thrombin time; FIB, fibrinogen; DCP, des-gamma-carboxy prothrombin ; TBIL, total bilirubin; DBIL, direct bilirubin; SF, serum ferritin; ALT, alanine aminotransferase; AST, aspartate transaminase; ALP, alkaline phosphatase; LDH, lactate dehydrogenase; γ-GGT, gamma-glutamyltransferase; AFU, alpha-L-fucosidase; 5'-NT, 5'-nucleotidase; TBA, total bile acid; TK1, thymidine kinase 1; HSP90α, heat-shock protein 90 alpha; C4, complement protein 4; CEA, carcinoembryonic antigen; CA125, carbohydrate antigen 125; CA153, carbohydrate antigen 153; CA199, carbohydrate antigen 199; AFP, alpha-fetoprotein; lens culinaris agglutinin-reactive fraction of AFP; HBsAg, hepatitis B surface antigen; HBeAg, hepatitis B e antigen.

**Table S4** ROC results of single index and logistic regression model

| Model                   | Training set             |             |             |          |                   |                 | Validation set           |             |             |          |                   |                 |
|-------------------------|--------------------------|-------------|-------------|----------|-------------------|-----------------|--------------------------|-------------|-------------|----------|-------------------|-----------------|
|                         | AUC<br>(95%CI)           | Sensitivity | Specificity | Accuracy | Optimal<br>cutoff | Youden<br>Index | AUC<br>(95%CI)           | Sensitivity | Specificity | Accuracy | Optimal<br>cutoff | Youden<br>Index |
| Gender=Male             | 0.727<br>(0.662 - 0.793) | 0.85465     | 0.6         | 0.78481  | -                 | 0.45465         | 0.708<br>(0.609 -0.807)  | 0.84932     | 0.56667     | 0.76699  | -                 | 0.41598         |
| Age                     | 0.641<br>(0.556-0.726)   | 0.87791     | 0.4         | 0.74684  | 42.5              | 0.27791         | 0.68<br>(0.563 - 0.798)  | 0.67123     | 0.63333     | 0.66019  | 50.5              | 0.30457         |
| Log <sub>10</sub> (DCP) | 0.799<br>(0.741 - 0.857) | 0.65698     | 0.83077     | 0.70464  | 1.2082            | 0.48775         | 0.834<br>(0.759 - 0.909) | 0.72603     | 0.9         | 0.7767   | 1.216             | 0.62603         |
| SF                      | 0.801<br>(0.734 - 0.868) | 0.83721     | 0.66154     | 0.78903  | 207.5             | 0.49875         | 0.717<br>(0.591 -0.843)  | 0.78082     | 0.7         | 0.75728  | 228               | 0.48082         |
| Log <sub>10</sub> (AFP) | 0.741<br>(0.676-0.805)   | 0.61047     | 0.78462     | 0.65823  | 0.56169           | 0.39508         | 0.646<br>(0.526-0.766)   | 0.64384     | 0.66667     | 0.65049  | 0.52178           | 0.3105          |
| HBsAg                   | 0.758<br>(0.689 -0.827)  | 0.70349     | 0.81538     | 0.73418  | 0.055             | 0.51887         | 0.795<br>(0.705-0.885)   | 0.67123     | 0.9         | 0.73786  | 0.035             | 0.57123         |
| GADSAH                  | 0.905<br>(0.861 - 0.950) | 0.86628     | 0.8         | 0.8481   | 0.62436           | 0.66628         | 0.88<br>(0.799 - 0.962)  | 0.82192     | 0.86667     | 0.83495  | 0.96197           | 0.68858         |

**Abbreviations:** ROC, receiver operating characteristic; AUC, area under the curve; CI, confidence interval; GADSAH: gender, age, log<sub>10</sub>(DCP), SF, log<sub>10</sub>(AFP)

and HBsAg; DCP, des-gamma-carboxy prothrombin; SF, serum ferritin; AFP, alpha-fetoprotein; HBsAg, hepatitis B surface antigen.
